# Supplementary material for: Synthesis and Evaluation of 99mTc-Labeled PSMA-Targeted Tracers Based on the Lys-Urea-Aad Pharmacophore for Detecting Prostate Cancer with Single Photon Emission Computed Tomography
Source: MDPI journal article supplement (doi:10.3390/molecules28135120), 2023-06-29
Supplement: s1 [file s1]

## SUPPLEMENTARY MATERIALS

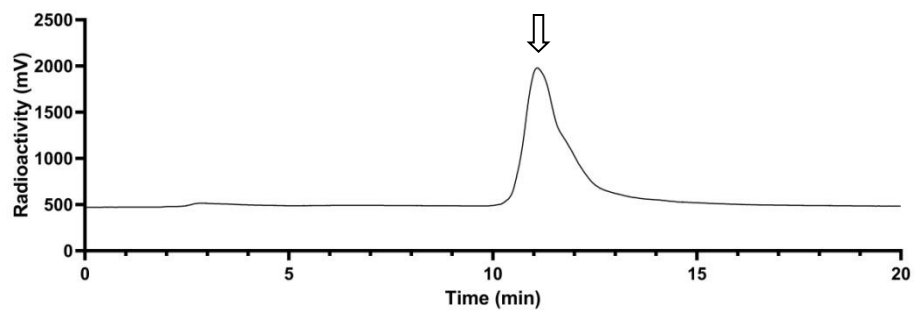

**Figure S1.** A representative QC radio-HPLC chromatogram of [ $^{99m}\text{Tc}$ ]Tc-EDDA/HYNIC-iPSMA. The desired product peak is pointed by an arrow.

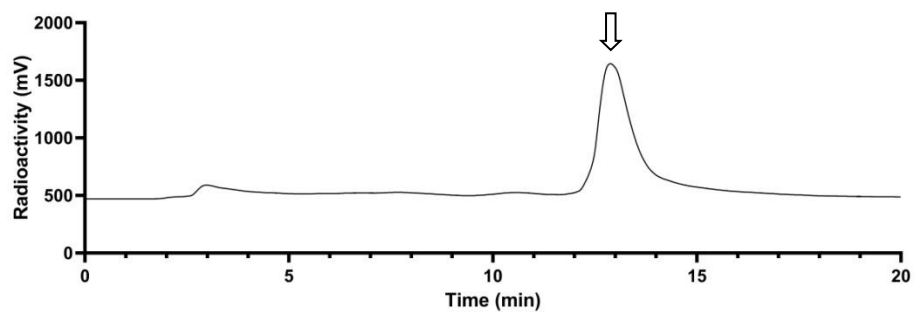

**Figure S2.** A representative QC radio-HPLC chromatogram of [ $^{99m}\text{Tc}$ ]Tc-EDDA-HTK03180. The desired product peak is pointed by an arrow.

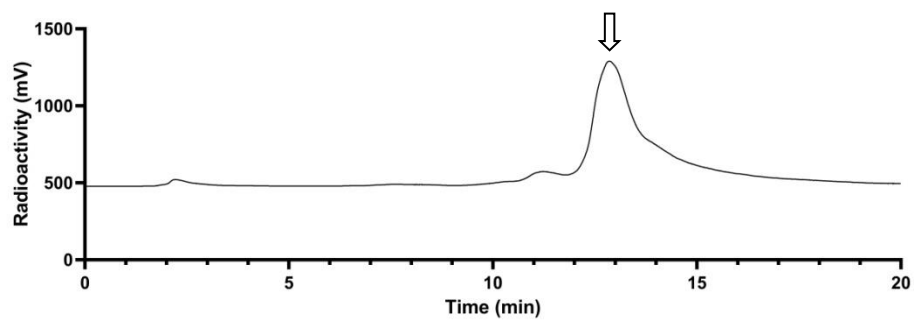

**Figure S3.** A representative QC radio-HPLC chromatogram of [ $^{99m}\text{Tc}$ ]Tc-EDDA-KL01099. The desired product peak is pointed by an arrow.

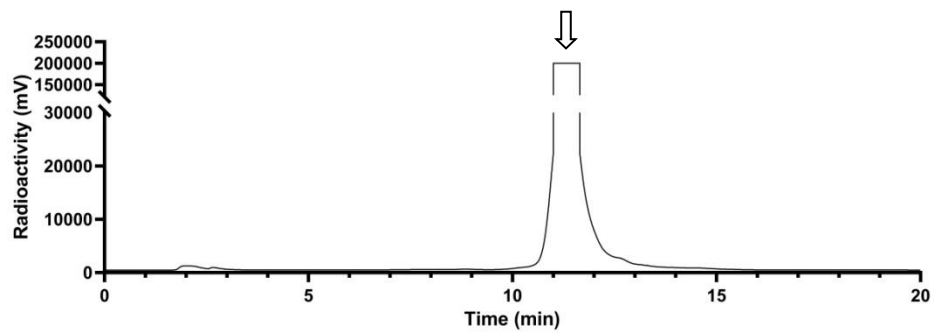

**Figure S4.** A representative QC radio-HPLC chromatogram of [ $^{99m}\text{Tc}$ ]Tc-EDDA-KL01127. The desired product peak is pointed by an arrow.

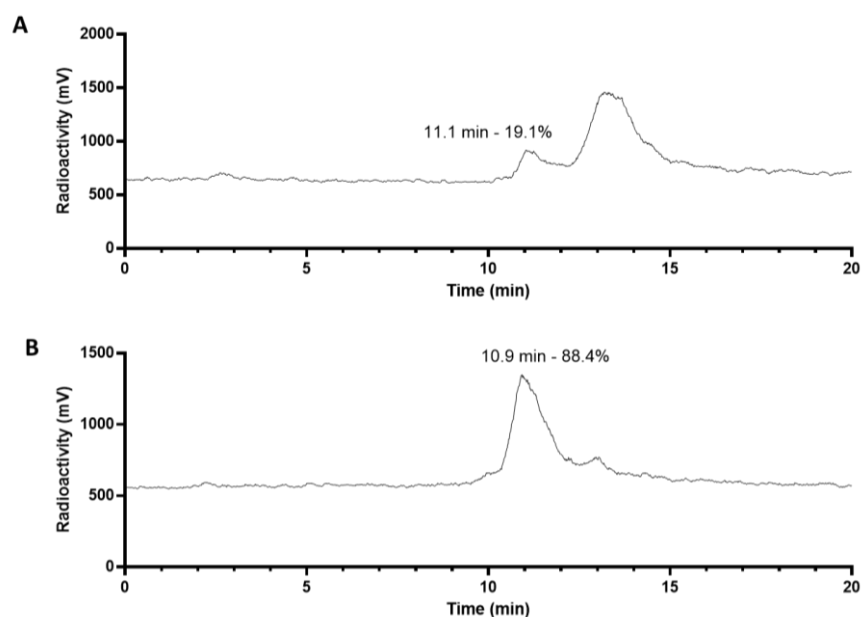

**Figure S5.** Representative radio-HPLC chromatograms of (A) plasma and (B) urine samples collected at 15 min post-injection from mice injected with [ $^{99m}\text{Tc}$ ]Tc-EDDA/HYNIC-iPSMA. The peaks with the percentages are the intact tracer.

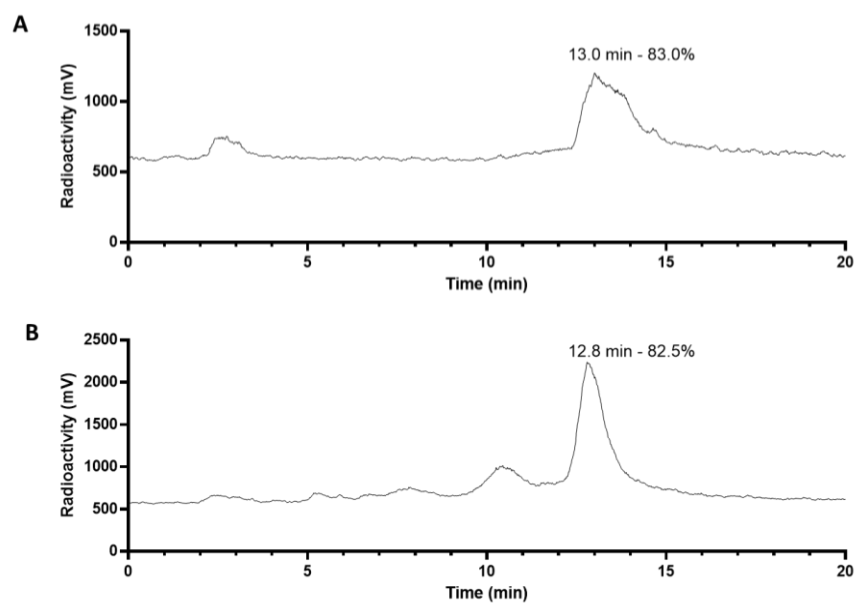

**Figure S6.** Representative radio-HPLC chromatograms of (A) plasma and (B) urine samples collected at 15 min post-injection from mice injected with [ $^{99m}\text{Tc}$ ]Tc-EDDA-HTK03180. The peaks with the percentages are the intact tracer.

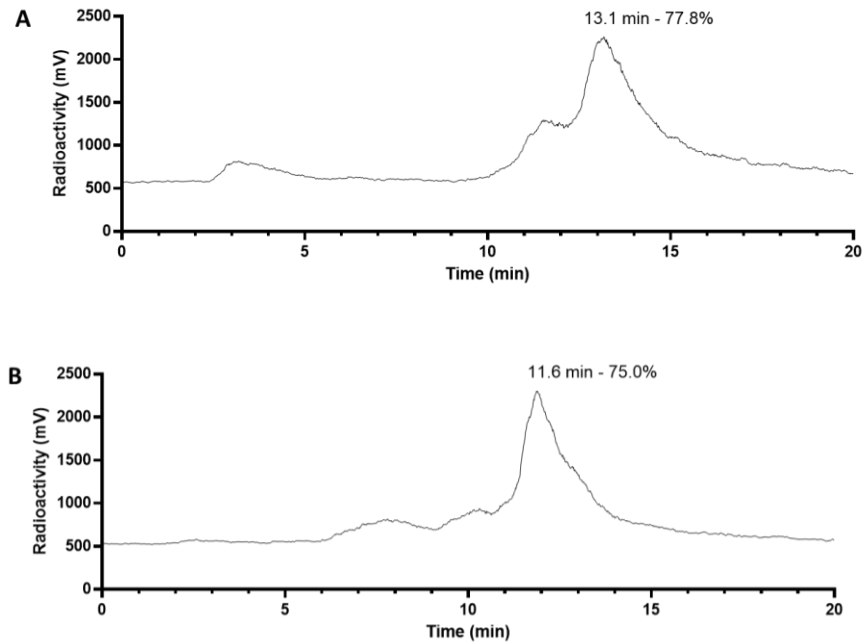

**Figure S7.** Representative radio-HPLC chromatograms of (A) plasma and (B) urine samples collected at 15 min post-injection from mice injected with [ $^{99m}\text{Tc}$ ]Tc-EDDA-KL01099. The peaks with the percentages are the intact tracer.

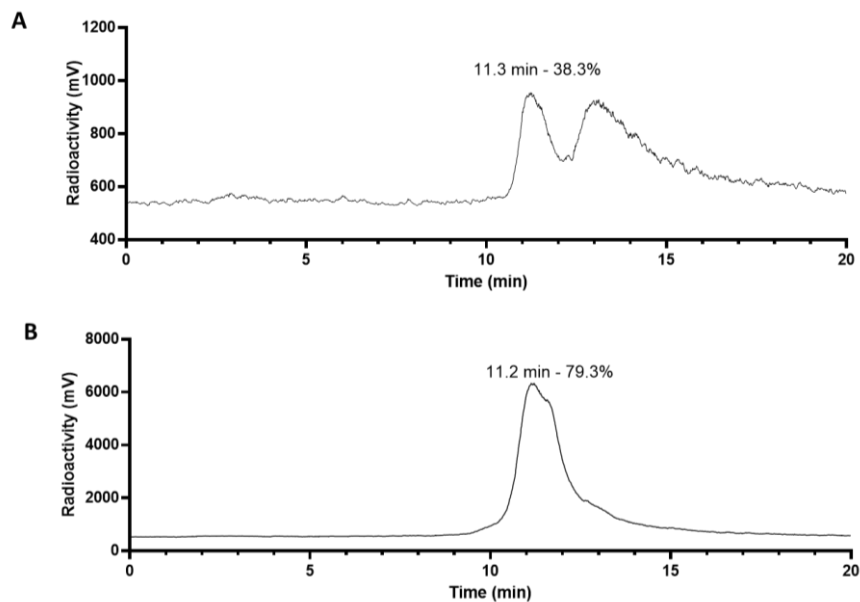

**Figure S8.** Representative radio-HPLC chromatograms of (A) plasma and (B) urine samples collected at 15 min post-injection from mice injected with [ $^{99m}\text{Tc}$ ]Tc-EDDA-KL01127. The peaks with the percentages are the intact tracer.

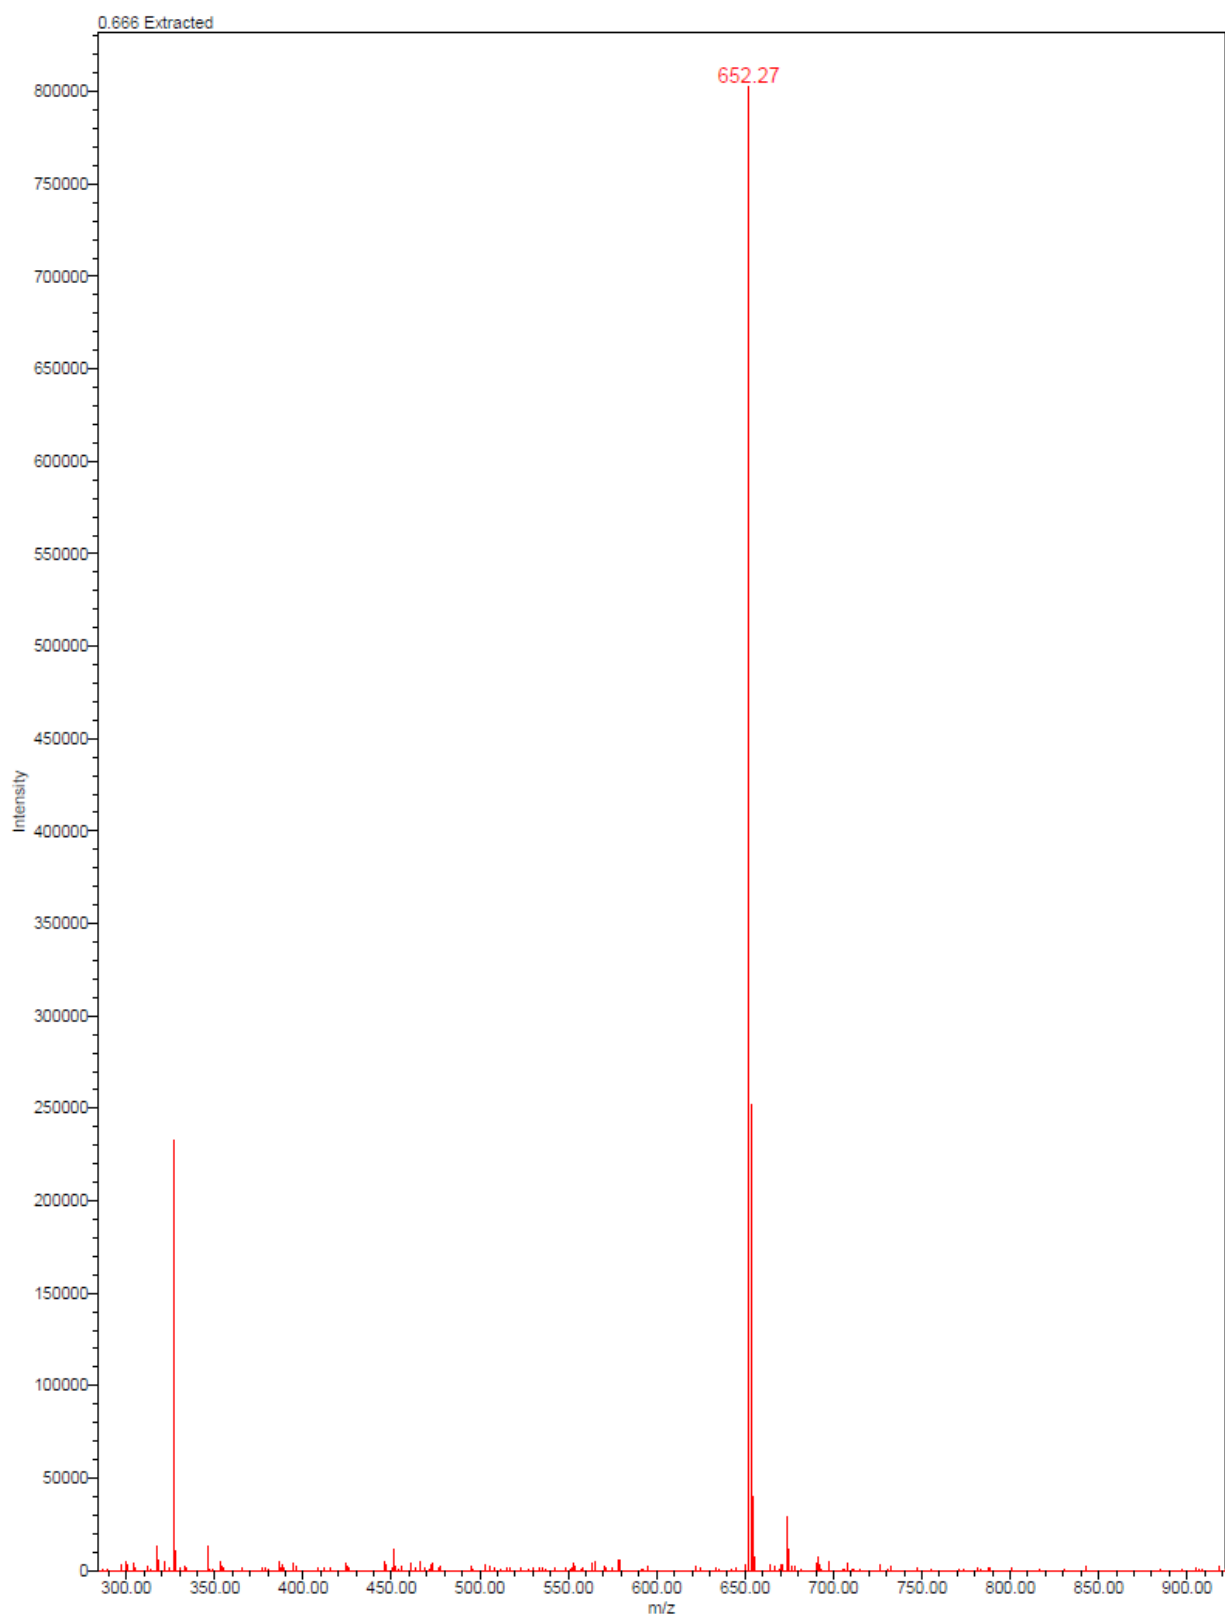

**Figure S9.** A representative MS spectrum of HYNIC-iPSMA. The calculated  $m/z$  value for  $[M+H]^+$  is 652.3; observed 652.3.

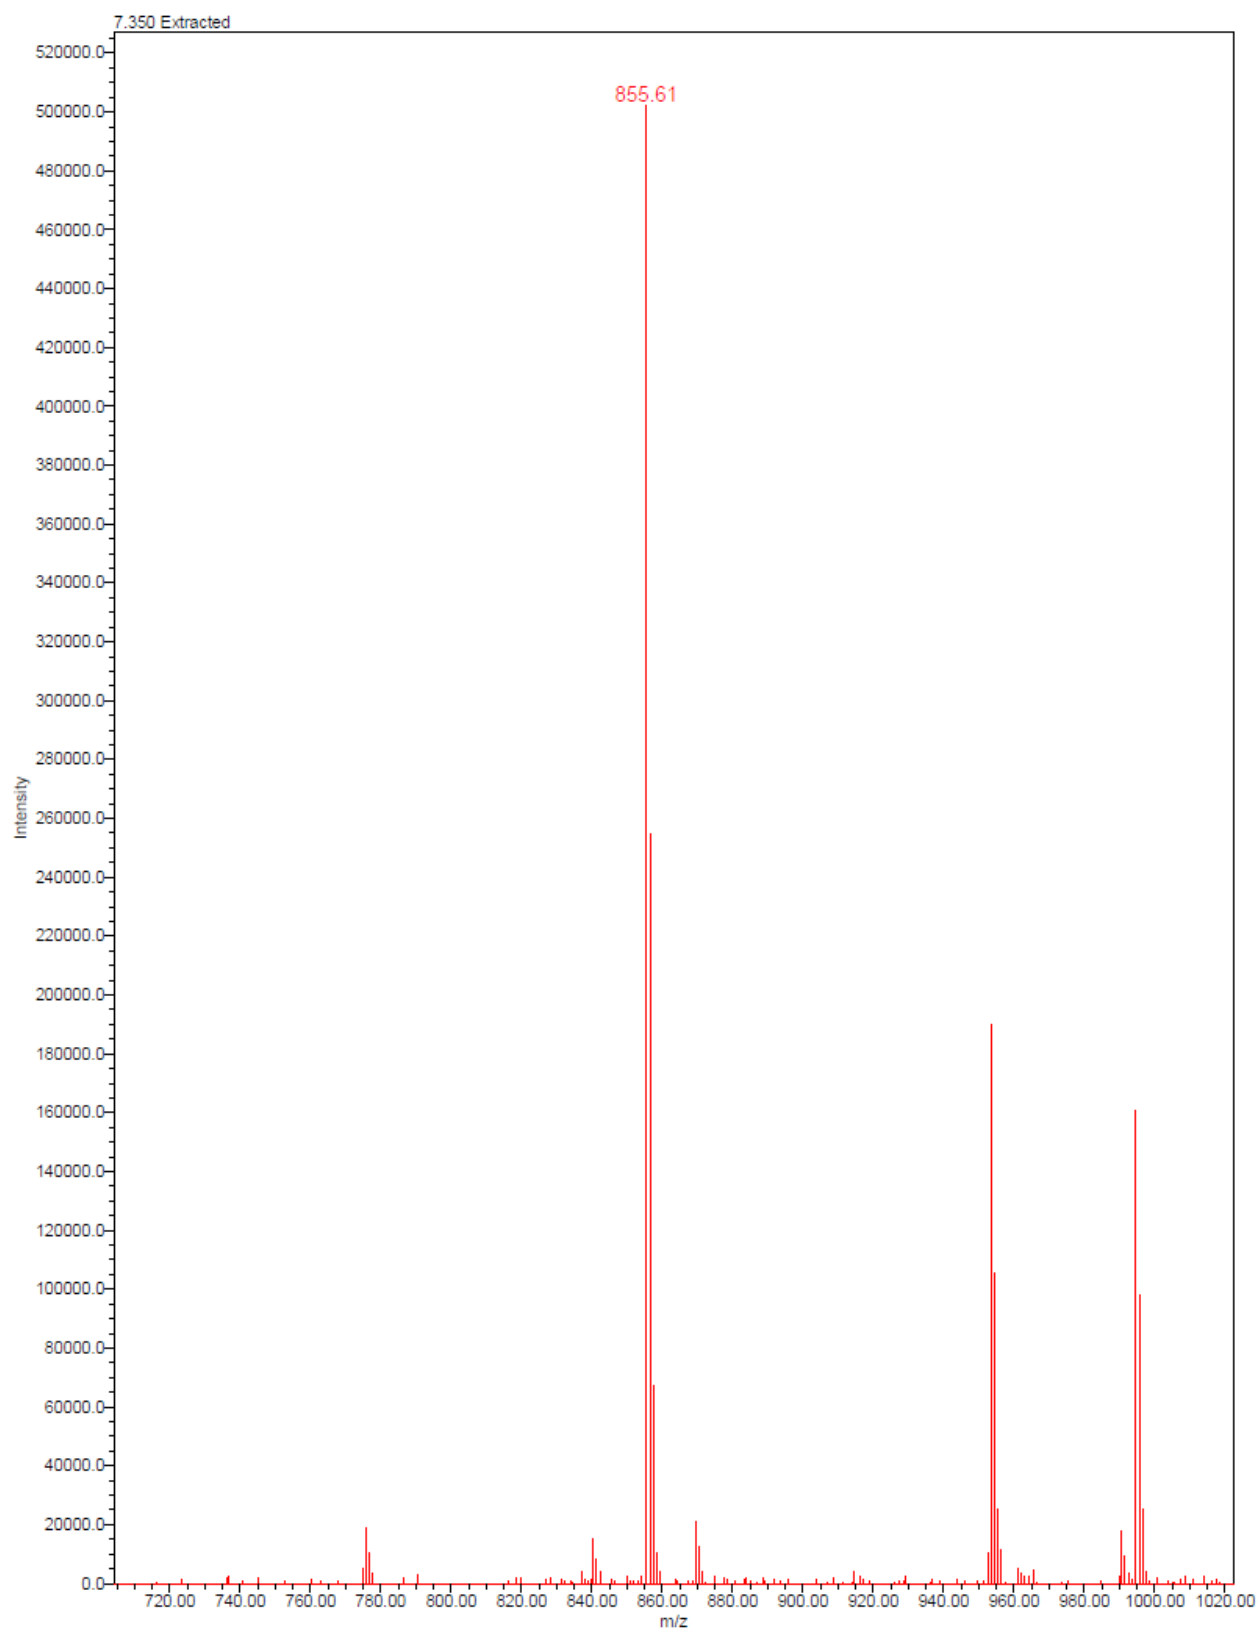

**Figure S10.** A representative MS spectrum of HTK03180. The calculated  $m/z$  value for  $[M+H]^+$  is 855.4; observed 855.6.

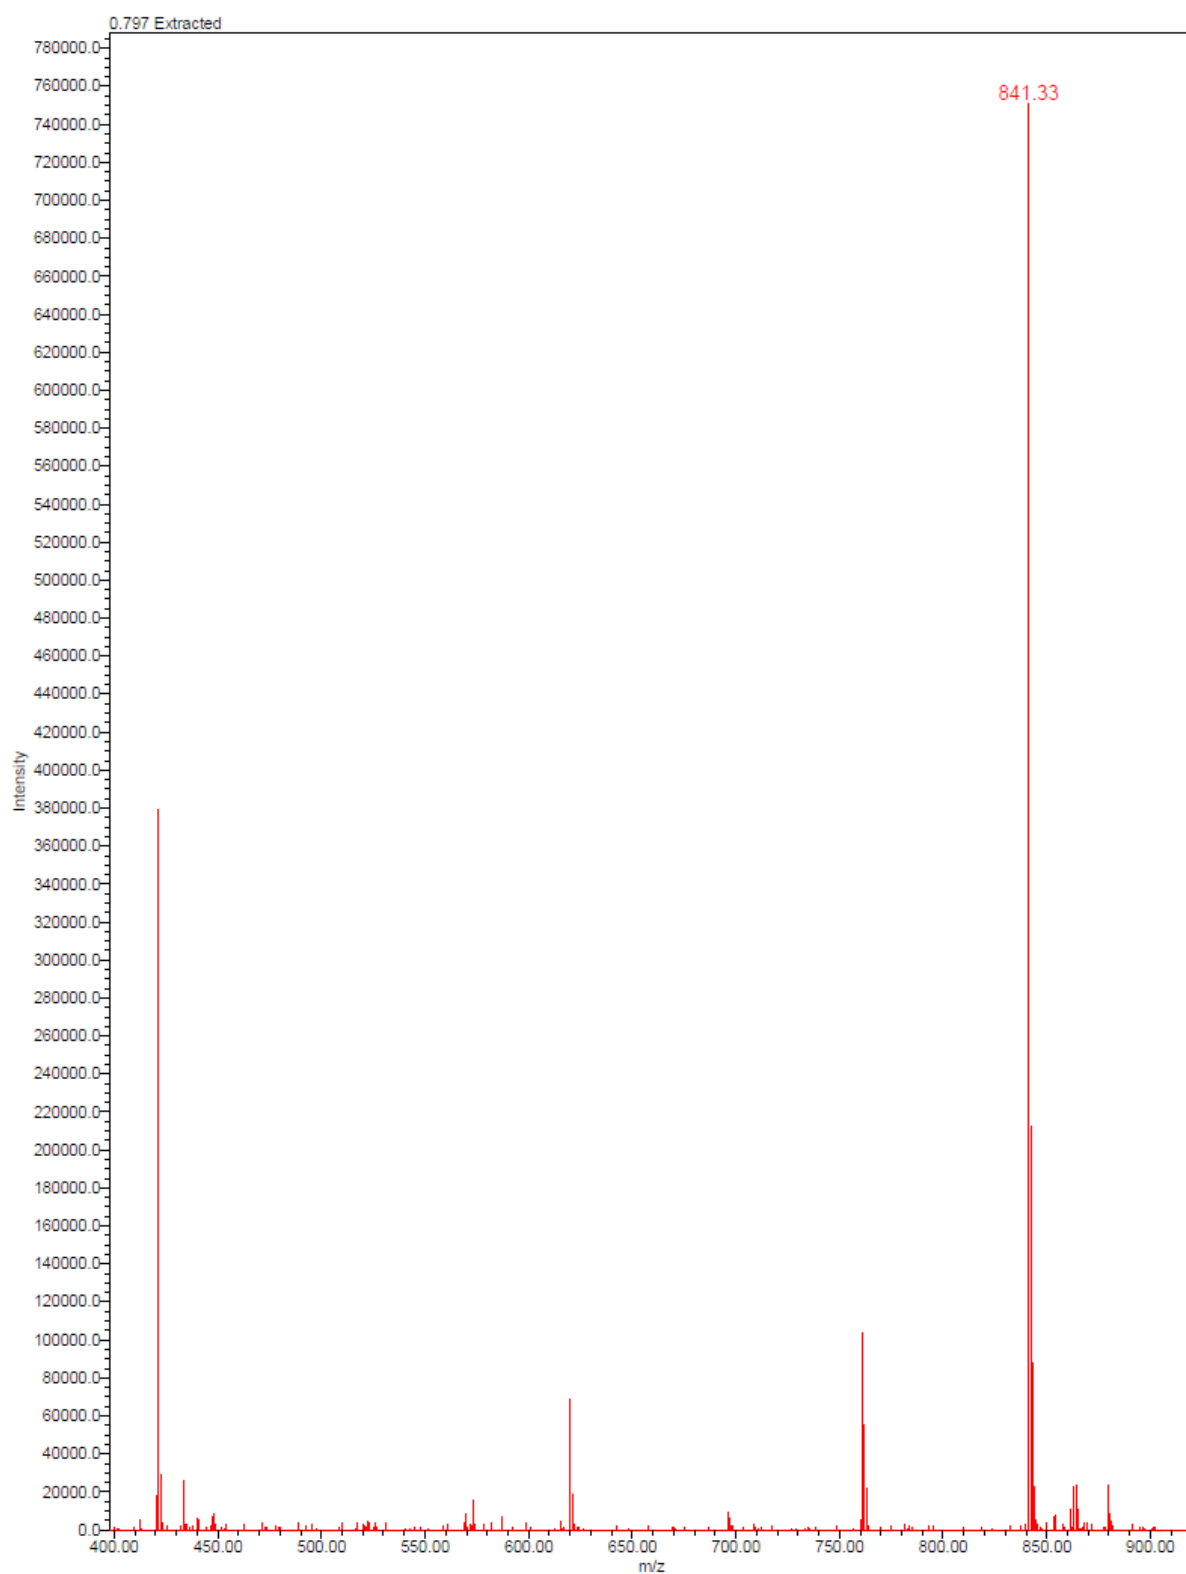

**Figure S11.** A representative MS spectrum of KL01099. The calculated  $m/z$  value for  $[M+H]^+$  is 841.4; observed 841.3.

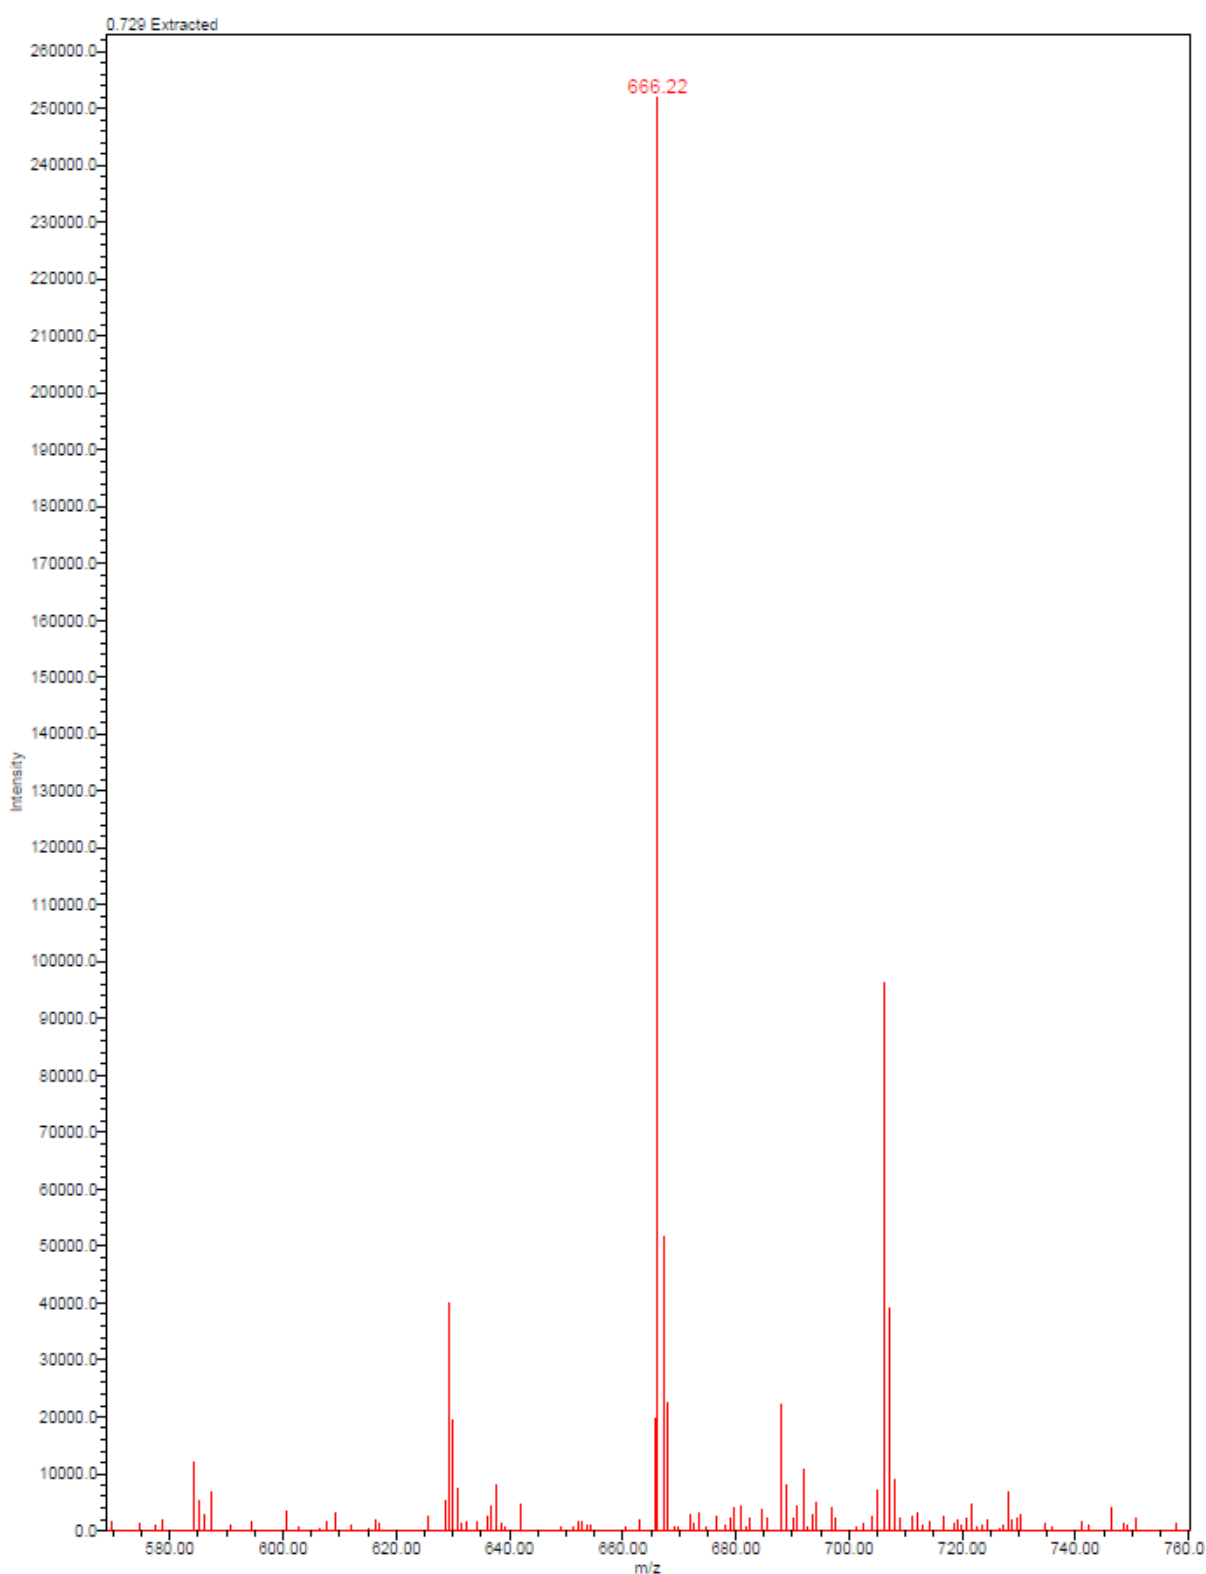

**Figure S12.** A representative MS spectrum of KL01127. The calculated  $m/z$  value for  $[M+H]^+$  is 666.3; observed 666.2.
